# Supplementary material for: AI-assisted image analysis and physiological validation for progressive drought detection in a diverse panel of Gossypium hirsutum L
Source: PubMed Central journal article supplement (PMC10915054; doi:10.3389/fpls.2023.1305292), 2024-02-21
Supplement: Table_3.pdf [file Table_3.pdf]

**Supplementary Table 3:**

| Time.Course    | Time.of.Day | Treatment | Genotype          | ID  | Volumetric.Soil.Water.Content |
|----------------|-------------|-----------|-------------------|-----|-------------------------------|
| Before Drought | Predawn     | WW        | AKDjuraVirescent  | 109 | 18.90                         |
| Before Drought | Predawn     | WW        | AKDjuraVirescent  | 136 | 23.00                         |
| Before Drought | Predawn     | WW        | Coker310          | 137 | 17.70                         |
| Before Drought | Predawn     | WW        | Coker310          | 29  | 19.80                         |
| Before Drought | Predawn     | WW        | CS50              | 30  | 20.30                         |
| Before Drought | Predawn     | WW        | CS50              | 3   | 28.50                         |
| Before Drought | Predawn     | WW        | CupLeaf           | 112 | 17.20                         |
| Before Drought | Predawn     | WW        | CupLeaf           | 58  | 22.90                         |
| Before Drought | Predawn     | WW        | DeltaPine154982XF | 113 | 15.30                         |
| Before Drought | Predawn     | WW        | DeltaPine154982XF | 59  | 19.00                         |
| Before Drought | Predawn     | WW        | DeltaPine16       | 6   | 19.10                         |
| Before Drought | Predawn     | WW        | DeltaPine16       | 60  | 19.60                         |
| Before Drought | Predawn     | WW        | DeRidderRed       | 115 | 21.50                         |
| Before Drought | Predawn     | WW        | DeRidderRed       | 142 | 25.80                         |
| Before Drought | Predawn     | WW        | Durango           | 62  | 23.80                         |
| Before Drought | Predawn     | WW        | Durango           | 143 | 25.10                         |
| Before Drought | Predawn     | WW        | DwarfRedHarrison  | 36  | 19.40                         |
| Before Drought | Predawn     | WW        | DwarfRedHarrison  | 90  | 20.80                         |
| Before Drought | Predawn     | WW        | FregoVirescent    | 91  | 15.90                         |
| Before Drought | Predawn     | WW        | FregoVirescent    | 10  | 20.10                         |
| Before Drought | Predawn     | WW        | Gumbo             | 119 | 19.30                         |
| Before Drought | Predawn     | WW        | Gumbo             | 65  | 24.70                         |
| Before Drought | Predawn     | WW        | L23               | 120 | 18.20                         |
| Before Drought | Predawn     | WW        | L23               | 93  | 18.50                         |
| Before Drought | Predawn     | WW        | Lankart57         | 67  | 20.40                         |
| Before Drought | Predawn     | WW        | Lankart57         | 148 | 25.80                         |
| Before Drought | Predawn     | WW        | Lorinator         | 14  | 16.20                         |
| Before Drought | Predawn     | WW        | Lorinator         | 122 | 20.40                         |
| Before Drought | Predawn     | WW        | Mexico910         | 42  | 22.10                         |
| Before Drought | Predawn     | WW        | Mexico910         | 150 | 23.20                         |
| Before Drought | Predawn     | WW        | PD3               | 17  | 18.80                         |
| Before Drought | Predawn     | WW        | PD3               | 98  | 20.40                         |
| Before Drought | Predawn     | WW        | Pronto            | 99  | 16.00                         |
| Before Drought | Predawn     | WW        | Pronto            | 45  | 24.00                         |
| Before Drought | Predawn     | WW        | SiokaraL23        | 154 | 16.50                         |
| Before Drought | Predawn     | WW        | SiokaraL23        | 19  | 22.50                         |
| Before Drought | Predawn     | WW        | SmallLeaf         | 74  | 23.10                         |
| Before Drought | Predawn     | WW        | SmallLeaf         | 47  | 28.70                         |
| Before Drought | Predawn     | WW        | Tipo_Chaco        | 102 | 19.40                         |
| Before Drought | Predawn     | WW        | Tipo_Chaco        | 75  | 22.70                         |
| Before Drought | Predawn     | WW        | TM_1              | 49  | 20.60                         |
| Before Drought | Predawn     | WW        | TM_1              | 157 | 24.00                         |
| Before Drought | Predawn     | WW        | TX_0180           | 104 | 13.20                         |
| Before Drought | Predawn     | WW        | TX_0180           | 50  | 18.60                         |
| Before Drought | Predawn     | WW        | UA48              | 78  | 18.70                         |
| Before Drought | Predawn     | WW        | UA48              | 159 | 24.20                         |
| Before Drought | Predawn     | WW        | UGA230            | 133 | 20.60                         |
| Before Drought | Predawn     | WW        | UGA230            | 160 | 21.40                         |
| Before Drought | Predawn     | WW        | VirescentNankeen  | 107 | 17.40                         |
| Before Drought | Predawn     | WW        | VirescentNankeen  | 26  | 22.70                         |

| Time.Course    | Time.of.Day | Treatment | Genotype          | ID  | Volumetric.Soil.Water.Content |
|----------------|-------------|-----------|-------------------|-----|-------------------------------|
| Before Drought | Predawn     | WW        | WesternStormproof | 135 | 19.70                         |
| Before Drought | Predawn     | WW        | WesternStormproof | 162 | 26.70                         |
| Before Drought | Midday      | WW        | AKDjuraVirescent  | 109 | 19.20                         |
| Before Drought | Midday      | WW        | AKDjuraVirescent  | 136 | 26.90                         |
| Before Drought | Midday      | WW        | Coker310          | 29  | 23.00                         |
| Before Drought | Midday      | WW        | Coker310          | 137 | 24.40                         |
| Before Drought | Midday      | WW        | CS50              | 30  | 22.50                         |
| Before Drought | Midday      | WW        | CS50              | 3   | 23.80                         |
| Before Drought | Midday      | WW        | CupLeaf           | 112 | 26.10                         |
| Before Drought | Midday      | WW        | CupLeaf           | 58  | 26.40                         |
| Before Drought | Midday      | WW        | DeltaPine154982XF | 113 | 18.30                         |
| Before Drought | Midday      | WW        | DeltaPine154982XF | 59  | 22.10                         |
| Before Drought | Midday      | WW        | DeltaPine16       | 6   | 20.90                         |
| Before Drought | Midday      | WW        | DeltaPine16       | 60  | 24.30                         |
| Before Drought | Midday      | WW        | DeRidderRed       | 115 | 21.40                         |
| Before Drought | Midday      | WW        | DeRidderRed       | 142 | 24.20                         |
| Before Drought | Midday      | WW        | Durango           | 143 | 27.30                         |
| Before Drought | Midday      | WW        | Durango           | 62  | 28.20                         |
| Before Drought | Midday      | WW        | DwarfRedHarrison  | 90  | 19.70                         |
| Before Drought | Midday      | WW        | DwarfRedHarrison  | 36  | 21.10                         |
| Before Drought | Midday      | WW        | FregoVirescent    | 10  | 17.30                         |
| Before Drought | Midday      | WW        | FregoVirescent    | 91  | 19.70                         |
| Before Drought | Midday      | WW        | Gumbo             | 119 | 19.90                         |
| Before Drought | Midday      | WW        | Gumbo             | 65  | 27.30                         |
| Before Drought | Midday      | WW        | L23               | 120 | 14.00                         |
| Before Drought | Midday      | WW        | L23               | 93  | 17.80                         |
| Before Drought | Midday      | WW        | Lankart57         | 148 | 25.70                         |
| Before Drought | Midday      | WW        | Lankart57         | 67  | 26.40                         |
| Before Drought | Midday      | WW        | Lorinator         | 122 | 21.00                         |
| Before Drought | Midday      | WW        | Lorinator         | 14  | 21.30                         |
| Before Drought | Midday      | WW        | Mexico910         | 42  | 24.20                         |
| Before Drought | Midday      | WW        | Mexico910         | 150 | 27.20                         |
| Before Drought | Midday      | WW        | PD3               | 98  | 18.00                         |
| Before Drought | Midday      | WW        | PD3               | 17  | 20.40                         |
| Before Drought | Midday      | WW        | Pronto            | 99  | 17.30                         |
| Before Drought | Midday      | WW        | Pronto            | 45  | 24.80                         |
| Before Drought | Midday      | WW        | SiokaraL23        | 154 | 22.50                         |
| Before Drought | Midday      | WW        | SiokaraL23        | 19  | 24.00                         |
| Before Drought | Midday      | WW        | SmallLeaf         | 74  | 18.90                         |
| Before Drought | Midday      | WW        | SmallLeaf         | 47  | 22.80                         |
| Before Drought | Midday      | WW        | Tipo_Chaco        | 75  | 22.80                         |
| Before Drought | Midday      | WW        | Tipo_Chaco        | 102 | 25.60                         |
| Before Drought | Midday      | WW        | TM_1              | 49  | 20.00                         |
| Before Drought | Midday      | WW        | TM_1              | 157 | 23.90                         |
| Before Drought | Midday      | WW        | TX_0180           | 104 | 16.00                         |
| Before Drought | Midday      | WW        | TX_0180           | 50  | 23.50                         |
| Before Drought | Midday      | WW        | UA48              | 78  | 20.00                         |
| Before Drought | Midday      | WW        | UA48              | 159 | 21.90                         |
| Before Drought | Midday      | WW        | UGA230            | 160 | 20.70                         |
| Before Drought | Midday      | WW        | UGA230            | 133 | 24.90                         |
| Before Drought | Midday      | WW        | VirescentNankeen  | 26  | 23.00                         |
| Before Drought | Midday      | WW        | VirescentNankeen  | 107 | 23.20                         |

| Time.Course    | Time.of.Day | Treatment | Genotype          | ID  | Volumetric.Soil.Water.Content |
|----------------|-------------|-----------|-------------------|-----|-------------------------------|
| Before Drought | Midday      | WW        | WesternStormproof | 135 | 23.90                         |
| Before Drought | Midday      | WW        | WesternStormproof | 162 | 26.20                         |
| Mild Drought   | Predawn     | DD        | AKDjuraVirescent  | 109 | 13.90                         |
| Mild Drought   | Predawn     | DD        | AKDjuraVirescent  | 136 | 20.60                         |
| Mild Drought   | Predawn     | DD        | Coker310          | 29  | 7.40                          |
| Mild Drought   | Predawn     | DD        | Coker310          | 56  | 8.20                          |
| Mild Drought   | Predawn     | DD        | CS50              | 3   | 4.60                          |
| Mild Drought   | Predawn     | DD        | CS50              | 30  | 7.60                          |
| Mild Drought   | Predawn     | DD        | CupLeaf           | 85  | 9.90                          |
| Mild Drought   | Predawn     | DD        | CupLeaf           | 112 | 15.70                         |
| Mild Drought   | Predawn     | DD        | DeltaPine154982XF | 59  | 8.30                          |
| Mild Drought   | Predawn     | DD        | DeltaPine154982XF | 113 | 16.80                         |
| Mild Drought   | Predawn     | DD        | DeltaPine16       | 6   | 5.10                          |
| Mild Drought   | Predawn     | DD        | DeltaPine16       | 60  | 8.50                          |
| Mild Drought   | Predawn     | DD        | DeRidderRed       | 7   | 5.70                          |
| Mild Drought   | Predawn     | DD        | DeRidderRed       | 115 | 16.90                         |
| Mild Drought   | Predawn     | DD        | Durango           | 35  | 7.80                          |
| Mild Drought   | Predawn     | DD        | Durango           | 62  | 8.70                          |
| Mild Drought   | Predawn     | DD        | DwarfRedHarrison  | 36  | 7.90                          |
| Mild Drought   | Predawn     | DD        | DwarfRedHarrison  | 90  | 10.30                         |
| Mild Drought   | Predawn     | DD        | FregoVirescent    | 10  | 6.10                          |
| Mild Drought   | Predawn     | DD        | FregoVirescent    | 64  | 8.80                          |
| Mild Drought   | Predawn     | DD        | Gumbo             | 65  | 8.90                          |
| Mild Drought   | Predawn     | DD        | Gumbo             | 119 | 17.40                         |
| Mild Drought   | Predawn     | DD        | L23               | 93  | 10.50                         |
| Mild Drought   | Predawn     | DD        | L23               | 120 | 17.60                         |
| Mild Drought   | Predawn     | DD        | Lankart57         | 67  | 9.00                          |
| Mild Drought   | Predawn     | DD        | Lankart57         | 148 | 21.20                         |
| Mild Drought   | Predawn     | DD        | Lorinator         | 14  | 6.40                          |
| Mild Drought   | Predawn     | DD        | Lorinator         | 122 | 18.60                         |
| Mild Drought   | Predawn     | DD        | Mexico910         | 42  | 8.00                          |
| Mild Drought   | Predawn     | DD        | Mexico910         | 150 | 21.90                         |
| Mild Drought   | Predawn     | DD        | PD3               | 17  | 6.50                          |
| Mild Drought   | Predawn     | DD        | PD3               | 98  | 10.70                         |
| Mild Drought   | Predawn     | DD        | Pronto            | 45  | 8.10                          |
| Mild Drought   | Predawn     | DD        | Pronto            | 99  | 10.90                         |
| Mild Drought   | Predawn     | DD        | SiokaraL23        | 19  | 6.50                          |
| Mild Drought   | Predawn     | DD        | SiokaraL23        | 154 | 22.00                         |
| Mild Drought   | Predawn     | DD        | SmallLeaf         | 20  | 6.50                          |
| Mild Drought   | Predawn     | DD        | SmallLeaf         | 47  | 8.10                          |
| Mild Drought   | Predawn     | DD        | Tipo_Chaco        | 21  | 6.90                          |
| Mild Drought   | Predawn     | DD        | Tipo_Chaco        | 102 | 11.20                         |
| Mild Drought   | Predawn     | DD        | TM_1              | 22  | 7.00                          |
| Mild Drought   | Predawn     | DD        | TM_1              | 157 | 23.90                         |
| Mild Drought   | Predawn     | DD        | TX_0180           | 50  | 8.20                          |
| Mild Drought   | Predawn     | DD        | TX_0180           | 104 | 11.40                         |
| Mild Drought   | Predawn     | DD        | UA48              | 78  | 9.40                          |
| Mild Drought   | Predawn     | DD        | UA48              | 159 | 24.10                         |
| Mild Drought   | Predawn     | DD        | UGA230            | 79  | 9.40                          |
| Mild Drought   | Predawn     | DD        | UGA230            | 133 | 19.80                         |
| Mild Drought   | Predawn     | DD        | VirescentNankeen  | 26  | 7.20                          |
| Mild Drought   | Predawn     | DD        | VirescentNankeen  | 80  | 9.60                          |

| Time.Course  | Time.of.Day | Treatment | Genotype          | ID  | Volumetric.Soil.Water.Content |
|--------------|-------------|-----------|-------------------|-----|-------------------------------|
| Mild Drought | Predawn     | DD        | WesternStormproof | 27  | 7.40                          |
| Mild Drought | Predawn     | DD        | WesternStormproof | 135 | 20.30                         |
| Mild Drought | Predawn     | WW        | Coker310          | 110 | 14.50                         |
| Mild Drought | Predawn     | WW        | CS50              | 84  | 9.70                          |
| Mild Drought | Predawn     | WW        | CupLeaf           | 31  | 7.60                          |
| Mild Drought | Predawn     | WW        | DeltaPine154982XF | 5   | 4.60                          |
| Mild Drought | Predawn     | WW        | DeltaPine16       | 87  | 10.20                         |
| Mild Drought | Predawn     | WW        | DeRidderRed       | 34  | 7.70                          |
| Mild Drought | Predawn     | WW        | Durango           | 8   | 6.00                          |
| Mild Drought | Predawn     | WW        | DwarfRedHarrison  | 117 | 17.40                         |
| Mild Drought | Predawn     | WW        | FregoVirescent    | 145 | 20.90                         |
| Mild Drought | Predawn     | WW        | Gumbo             | 38  | 7.90                          |
| Mild Drought | Predawn     | WW        | Lankart57         | 121 | 18.30                         |
| Mild Drought | Predawn     | WW        | Lorinator         | 95  | 10.60                         |
| Mild Drought | Predawn     | WW        | Mexico910         | 69  | 9.00                          |
| Mild Drought | Predawn     | WW        | PD3               | 71  | 9.10                          |
| Mild Drought | Predawn     | WW        | SmallLeaf         | 101 | 10.90                         |
| Mild Drought | Predawn     | WW        | Tipo_Chaco        | 75  | 9.20                          |
| Mild Drought | Predawn     | WW        | TM_1              | 103 | 11.30                         |
| Mild Drought | Predawn     | WW        | TX_0180           | 77  | 9.30                          |
| Mild Drought | Predawn     | WW        | UGA230            | 160 | 25.10                         |
| Mild Drought | Predawn     | WW        | VirescentNankeen  | 107 | 11.60                         |
| Mild Drought | Predawn     | WW        | WesternStormproof | 108 | 13.90                         |
| Mild Drought | Midday      | DD        | AKDjuraVirescent  | 109 | 14.50                         |
| Mild Drought | Midday      | DD        | AKDjuraVirescent  | 136 | 20.80                         |
| Mild Drought | Midday      | DD        | Coker310          | 29  | 7.50                          |
| Mild Drought | Midday      | DD        | Coker310          | 56  | 8.20                          |
| Mild Drought | Midday      | DD        | CS50              | 3   | 4.60                          |
| Mild Drought | Midday      | DD        | CS50              | 30  | 7.50                          |
| Mild Drought | Midday      | DD        | CupLeaf           | 85  | 9.90                          |
| Mild Drought | Midday      | DD        | CupLeaf           | 112 | 16.50                         |
| Mild Drought | Midday      | DD        | DeltaPine154982XF | 59  | 8.40                          |
| Mild Drought | Midday      | DD        | DeltaPine154982XF | 113 | 16.50                         |
| Mild Drought | Midday      | DD        | DeltaPine16       | 6   | 5.40                          |
| Mild Drought | Midday      | DD        | DeltaPine16       | 60  | 8.60                          |
| Mild Drought | Midday      | DD        | DeRidderRed       | 7   | 5.60                          |
| Mild Drought | Midday      | DD        | DeRidderRed       | 115 | 16.80                         |
| Mild Drought | Midday      | DD        | Durango           | 35  | 7.80                          |
| Mild Drought | Midday      | DD        | Durango           | 62  | 8.80                          |
| Mild Drought | Midday      | DD        | DwarfRedHarrison  | 36  | 7.90                          |
| Mild Drought | Midday      | DD        | DwarfRedHarrison  | 90  | 10.30                         |
| Mild Drought | Midday      | DD        | FregoVirescent    | 10  | 6.20                          |
| Mild Drought | Midday      | DD        | FregoVirescent    | 64  | 8.90                          |
| Mild Drought | Midday      | DD        | Gumbo             | 65  | 8.90                          |
| Mild Drought | Midday      | DD        | Gumbo             | 119 | 17.60                         |
| Mild Drought | Midday      | DD        | L23               | 93  | 10.40                         |
| Mild Drought | Midday      | DD        | L23               | 120 | 18.00                         |
| Mild Drought | Midday      | DD        | Lankart57         | 67  | 8.90                          |
| Mild Drought | Midday      | DD        | Lankart57         | 148 | 21.40                         |
| Mild Drought | Midday      | DD        | Lorinator         | 14  | 6.30                          |
| Mild Drought | Midday      | DD        | Lorinator         | 122 | 19.40                         |
| Mild Drought | Midday      | DD        | Mexico910         | 42  | 8.00                          |

| Time.Course    | Time.of.Day | Treatment | Genotype          | ID  | Volumetric.Soil.Water.Content |
|----------------|-------------|-----------|-------------------|-----|-------------------------------|
| Mild Drought   | Midday      | DD        | Mexico910         | 150 | 21.60                         |
| Mild Drought   | Midday      | DD        | PD3               | 17  | 6.50                          |
| Mild Drought   | Midday      | DD        | PD3               | 98  | 10.80                         |
| Mild Drought   | Midday      | DD        | Pronto            | 45  | 8.00                          |
| Mild Drought   | Midday      | DD        | Pronto            | 99  | 10.90                         |
| Mild Drought   | Midday      | DD        | SiokaraL23        | 19  | 6.50                          |
| Mild Drought   | Midday      | DD        | SiokaraL23        | 154 | 22.60                         |
| Mild Drought   | Midday      | DD        | SmallLeaf         | 20  | 6.70                          |
| Mild Drought   | Midday      | DD        | SmallLeaf         | 47  | 8.10                          |
| Mild Drought   | Midday      | DD        | Tipo_Chaco        | 21  | 6.90                          |
| Mild Drought   | Midday      | DD        | Tipo_Chaco        | 102 | 11.20                         |
| Mild Drought   | Midday      | DD        | TM_1              | 22  | 7.00                          |
| Mild Drought   | Midday      | DD        | TM_1              | 157 | 23.10                         |
| Mild Drought   | Midday      | DD        | TX_0180           | 50  | 8.20                          |
| Mild Drought   | Midday      | DD        | TX_0180           | 104 | 11.60                         |
| Mild Drought   | Midday      | DD        | UA48              | 78  | 9.40                          |
| Mild Drought   | Midday      | DD        | UA48              | 159 | 24.50                         |
| Mild Drought   | Midday      | DD        | UGA230            | 79  | 9.50                          |
| Mild Drought   | Midday      | DD        | UGA230            | 133 | 19.70                         |
| Mild Drought   | Midday      | DD        | VirescentNankeen  | 26  | 7.10                          |
| Mild Drought   | Midday      | DD        | VirescentNankeen  | 80  | 9.60                          |
| Mild Drought   | Midday      | DD        | WesternStormproof | 27  | 7.40                          |
| Mild Drought   | Midday      | DD        | WesternStormproof | 135 | 20.50                         |
| Mild Drought   | Midday      | WW        | Coker310          | 110 | 14.60                         |
| Mild Drought   | Midday      | WW        | CS50              | 84  | 9.80                          |
| Mild Drought   | Midday      | WW        | CupLeaf           | 31  | 7.60                          |
| Mild Drought   | Midday      | WW        | DeltaPine154982XF | 5   | 4.80                          |
| Mild Drought   | Midday      | WW        | DeltaPine16       | 87  | 10.30                         |
| Mild Drought   | Midday      | WW        | DeRidderRed       | 34  | 7.70                          |
| Mild Drought   | Midday      | WW        | Durango           | 8   | 5.90                          |
| Mild Drought   | Midday      | WW        | DwarfRedHarrison  | 117 | 17.40                         |
| Mild Drought   | Midday      | WW        | FregoVirescent    | 145 | 21.00                         |
| Mild Drought   | Midday      | WW        | Gumbo             | 38  | 7.90                          |
| Mild Drought   | Midday      | WW        | Lankart57         | 121 | 18.50                         |
| Mild Drought   | Midday      | WW        | Lorinator         | 95  | 10.60                         |
| Mild Drought   | Midday      | WW        | Mexico910         | 69  | 9.10                          |
| Mild Drought   | Midday      | WW        | PD3               | 71  | 9.20                          |
| Mild Drought   | Midday      | WW        | SmallLeaf         | 101 | 11.10                         |
| Mild Drought   | Midday      | WW        | Tipo_Chaco        | 75  | 9.30                          |
| Mild Drought   | Midday      | WW        | TM_1              | 103 | 11.40                         |
| Mild Drought   | Midday      | WW        | TX_0180           | 77  | 9.30                          |
| Mild Drought   | Midday      | WW        | UGA230            | 160 | 26.10                         |
| Mild Drought   | Midday      | WW        | VirescentNankeen  | 107 | 11.70                         |
| Mild Drought   | Midday      | WW        | WesternStormproof | 108 | 13.50                         |
| Severe Drought | Predawn     | DD        | AKDjuraVirescent  | 109 | 0.20                          |
| Severe Drought | Predawn     | DD        | AKDjuraVirescent  | 136 | 0.80                          |
| Severe Drought | Predawn     | DD        | Coker310          | 29  | 0.90                          |
| Severe Drought | Predawn     | DD        | Coker310          | 56  | 1.70                          |
| Severe Drought | Predawn     | DD        | CS50              | 3   | 1.10                          |
| Severe Drought | Predawn     | DD        | CS50              | 30  | 0.60                          |
| Severe Drought | Predawn     | DD        | CupLeaf           | 4   | 14.70                         |
| Severe Drought | Predawn     | DD        | CupLeaf           | 85  | 0.70                          |

| Time.Course    | Time.of.Day | Treatment | Genotype          | ID  | Volumetric.Soil.Water.Content |
|----------------|-------------|-----------|-------------------|-----|-------------------------------|
| Severe Drought | Predawn     | DD        | CupLeaf           | 112 | 10.30                         |
| Severe Drought | Predawn     | DD        | DeltaPine154982XF | 59  | 0.01                          |
| Severe Drought | Predawn     | DD        | DeltaPine154982XF | 113 | 0.20                          |
| Severe Drought | Predawn     | DD        | DeltaPine16       | 6   | 0.40                          |
| Severe Drought | Predawn     | DD        | DeltaPine16       | 60  | 0.40                          |
| Severe Drought | Predawn     | DD        | DeRidderRed       | 7   | 1.30                          |
| Severe Drought | Predawn     | DD        | DeRidderRed       | 115 | 0.01                          |
| Severe Drought | Predawn     | DD        | Durango           | 35  | 0.01                          |
| Severe Drought | Predawn     | DD        | Durango           | 62  | 0.01                          |
| Severe Drought | Predawn     | DD        | DwarfRedHarrison  | 36  | 0.20                          |
| Severe Drought | Predawn     | DD        | DwarfRedHarrison  | 90  | 0.50                          |
| Severe Drought | Predawn     | DD        | FregoVirescent    | 10  | 0.50                          |
| Severe Drought | Predawn     | DD        | FregoVirescent    | 64  | 0.60                          |
| Severe Drought | Predawn     | DD        | FregoVirescent    | 91  | 1.80                          |
| Severe Drought | Predawn     | DD        | Gumbo             | 65  | 0.10                          |
| Severe Drought | Predawn     | DD        | Gumbo             | 119 | 2.40                          |
| Severe Drought | Predawn     | DD        | L23               | 93  | 2.20                          |
| Severe Drought | Predawn     | DD        | L23               | 120 | 1.10                          |
| Severe Drought | Predawn     | DD        | Lankart57         | 67  | 7.80                          |
| Severe Drought | Predawn     | DD        | Lankart57         | 148 | 0.01                          |
| Severe Drought | Predawn     | DD        | Lorinator         | 14  | 3.50                          |
| Severe Drought | Predawn     | DD        | Lorinator         | 122 | 1.60                          |
| Severe Drought | Predawn     | DD        | Mexico910         | 42  | 1.80                          |
| Severe Drought | Predawn     | DD        | Mexico910         | 150 | 0.90                          |
| Severe Drought | Predawn     | DD        | PD3               | 17  | 0.40                          |
| Severe Drought | Predawn     | DD        | PD3               | 98  | 2.00                          |
| Severe Drought | Predawn     | DD        | Pronto            | 45  | 0.40                          |
| Severe Drought | Predawn     | DD        | Pronto            | 99  | 0.90                          |
| Severe Drought | Predawn     | DD        | SiokaraL23        | 19  | 1.80                          |
| Severe Drought | Predawn     | DD        | SiokaraL23        | 154 | 1.10                          |
| Severe Drought | Predawn     | DD        | SmallLeaf         | 20  | 1.00                          |
| Severe Drought | Predawn     | DD        | SmallLeaf         | 47  | 0.20                          |
| Severe Drought | Predawn     | DD        | Tipo_Chaco        | 21  | 3.00                          |
| Severe Drought | Predawn     | DD        | Tipo_Chaco        | 48  | 0.20                          |
| Severe Drought | Predawn     | DD        | Tipo_Chaco        | 102 | 0.40                          |
| Severe Drought | Predawn     | DD        | TM_1              | 22  | 0.01                          |
| Severe Drought | Predawn     | DD        | TM_1              | 130 | 25.70                         |
| Severe Drought | Predawn     | DD        | TM_1              | 157 | 0.30                          |
| Severe Drought | Predawn     | DD        | TX_0180           | 50  | 0.80                          |
| Severe Drought | Predawn     | DD        | TX_0180           | 104 | 2.10                          |
| Severe Drought | Predawn     | DD        | UA48              | 78  | 1.10                          |
| Severe Drought | Predawn     | DD        | UA48              | 159 | 0.01                          |
| Severe Drought | Predawn     | DD        | UGA230            | 79  | 0.01                          |
| Severe Drought | Predawn     | DD        | UGA230            | 133 | 0.01                          |
| Severe Drought | Predawn     | DD        | VirescentNankeen  | 26  | 0.01                          |
| Severe Drought | Predawn     | DD        | VirescentNankeen  | 80  | 0.80                          |
| Severe Drought | Predawn     | DD        | WesternStormproof | 27  | 5.30                          |
| Severe Drought | Predawn     | DD        | WesternStormproof | 135 | 0.10                          |
| Severe Drought | Predawn     | WW        | Coker310          | 110 | 20.10                         |
| Severe Drought | Predawn     | WW        | CS50              | 84  | 20.90                         |
| Severe Drought | Predawn     | WW        | CupLeaf           | 58  | 24.20                         |
| Severe Drought | Predawn     | WW        | DeltaPine154982XF | 5   | 17.00                         |

| Time.Course    | Time.of.Day | Treatment | Genotype          | ID  | Volumetric.Soil.Water.Content |
|----------------|-------------|-----------|-------------------|-----|-------------------------------|
| Severe Drought | Predawn     | WW        | DeltaPine16       | 87  | 17.90                         |
| Severe Drought | Predawn     | WW        | DeltaPine16       | 114 | 16.00                         |
| Severe Drought | Predawn     | WW        | DeRidderRed       | 34  | 16.50                         |
| Severe Drought | Predawn     | WW        | DeRidderRed       | 88  | 20.80                         |
| Severe Drought | Predawn     | WW        | DeRidderRed       | 142 | 16.00                         |
| Severe Drought | Predawn     | WW        | Durango           | 8   | 23.30                         |
| Severe Drought | Predawn     | WW        | Durango           | 89  | 16.00                         |
| Severe Drought | Predawn     | WW        | DwarfRedHarrison  | 63  | 20.80                         |
| Severe Drought | Predawn     | WW        | DwarfRedHarrison  | 117 | 15.00                         |
| Severe Drought | Predawn     | WW        | DwarfRedHarrison  | 144 | 22.40                         |
| Severe Drought | Predawn     | WW        | FregoVirescent    | 145 | 23.50                         |
| Severe Drought | Predawn     | WW        | Gumbo             | 11  | 20.20                         |
| Severe Drought | Predawn     | WW        | Gumbo             | 38  | 19.20                         |
| Severe Drought | Predawn     | WW        | Lankart57         | 94  | 11.80                         |
| Severe Drought | Predawn     | WW        | Lankart57         | 121 | 17.40                         |
| Severe Drought | Predawn     | WW        | Lorinator         | 41  | 21.80                         |
| Severe Drought | Predawn     | WW        | Lorinator         | 95  | 16.00                         |
| Severe Drought | Predawn     | WW        | Lorinator         | 149 | 18.10                         |
| Severe Drought | Predawn     | WW        | Mexico910         | 69  | 22.20                         |
| Severe Drought | Predawn     | WW        | NM240162          | 70  | 17.90                         |
| Severe Drought | Predawn     | WW        | PD3               | 44  | 16.00                         |
| Severe Drought | Predawn     | WW        | PD3               | 71  | 20.60                         |
| Severe Drought | Predawn     | WW        | PD3               | 125 | 24.90                         |
| Severe Drought | Predawn     | WW        | SmallLeaf         | 74  | 20.60                         |
| Severe Drought | Predawn     | WW        | SmallLeaf         | 101 | 19.80                         |
| Severe Drought | Predawn     | WW        | Tipo_Chaco        | 75  | 21.50                         |
| Severe Drought | Predawn     | WW        | TM_1              | 49  | 25.40                         |
| Severe Drought | Predawn     | WW        | TM_1              | 76  | 25.30                         |
| Severe Drought | Predawn     | WW        | TM_1              | 103 | 17.90                         |
| Severe Drought | Predawn     | WW        | TX_0180           | 23  | 16.00                         |
| Severe Drought | Predawn     | WW        | TX_0180           | 77  | 22.40                         |
| Severe Drought | Predawn     | WW        | UGA230            | 52  | 25.90                         |
| Severe Drought | Predawn     | WW        | UGA230            | 160 | 21.10                         |
| Severe Drought | Predawn     | WW        | VirescentNankeen  | 53  | 17.10                         |
| Severe Drought | Predawn     | WW        | VirescentNankeen  | 107 | 17.60                         |
| Severe Drought | Predawn     | WW        | WesternStormproof | 108 | 22.00                         |
| Severe Drought | Predawn     | WW        | WesternStormproof | 162 | 23.40                         |
| Severe Drought | Midday      | DD        | AKDjuraVirescent  | 109 | 0.20                          |
| Severe Drought | Midday      | DD        | AKDjuraVirescent  | 136 | 1.10                          |
| Severe Drought | Midday      | DD        | Coker310          | 29  | 0.90                          |
| Severe Drought | Midday      | DD        | Coker310          | 56  | 1.90                          |
| Severe Drought | Midday      | DD        | CS50              | 3   | 1.30                          |
| Severe Drought | Midday      | DD        | CS50              | 30  | 0.70                          |
| Severe Drought | Midday      | DD        | CupLeaf           | 4   | 17.10                         |
| Severe Drought | Midday      | DD        | CupLeaf           | 85  | 0.80                          |
| Severe Drought | Midday      | DD        | CupLeaf           | 112 | 9.30                          |
| Severe Drought | Midday      | DD        | DeltaPine154982XF | 59  | 0.20                          |
| Severe Drought | Midday      | DD        | DeltaPine154982XF | 113 | 0.01                          |
| Severe Drought | Midday      | DD        | DeltaPine16       | 6   | 0.01                          |
| Severe Drought | Midday      | DD        | DeltaPine16       | 60  | 0.01                          |
| Severe Drought | Midday      | DD        | DeRidderRed       | 7   | 0.60                          |
| Severe Drought | Midday      | DD        | DeRidderRed       | 115 | 0.50                          |

| Time.Course    | Time.of.Day | Treatment | Genotype          | ID  | Volumetric.Soil.Water.Content |
|----------------|-------------|-----------|-------------------|-----|-------------------------------|
| Severe Drought | Midday      | DD        | Durango           | 35  | 0.10                          |
| Severe Drought | Midday      | DD        | Durango           | 62  | 0.01                          |
| Severe Drought | Midday      | DD        | DwarfRedHarrison  | 36  | 0.60                          |
| Severe Drought | Midday      | DD        | DwarfRedHarrison  | 90  | 0.40                          |
| Severe Drought | Midday      | DD        | FregoVirescent    | 10  | 0.01                          |
| Severe Drought | Midday      | DD        | FregoVirescent    | 64  | 0.60                          |
| Severe Drought | Midday      | DD        | FregoVirescent    | 91  | 1.30                          |
| Severe Drought | Midday      | DD        | Gumbo             | 65  | 0.30                          |
| Severe Drought | Midday      | DD        | Gumbo             | 119 | 2.90                          |
| Severe Drought | Midday      | DD        | L23               | 93  | 3.90                          |
| Severe Drought | Midday      | DD        | L23               | 120 | 0.70                          |
| Severe Drought | Midday      | DD        | Lankart57         | 67  | 3.50                          |
| Severe Drought | Midday      | DD        | Lankart57         | 148 | 0.40                          |
| Severe Drought | Midday      | DD        | Lorinator         | 14  | 1.60                          |
| Severe Drought | Midday      | DD        | Lorinator         | 122 | 1.40                          |
| Severe Drought | Midday      | DD        | Mexico910         | 42  | 1.90                          |
| Severe Drought | Midday      | DD        | Mexico910         | 150 | 0.30                          |
| Severe Drought | Midday      | DD        | PD3               | 17  | 0.40                          |
| Severe Drought | Midday      | DD        | PD3               | 98  | 2.80                          |
| Severe Drought | Midday      | DD        | Pronto            | 45  | 0.60                          |
| Severe Drought | Midday      | DD        | Pronto            | 99  | 1.10                          |
| Severe Drought | Midday      | DD        | SiokaraL23        | 19  | 2.30                          |
| Severe Drought | Midday      | DD        | SiokaraL23        | 154 | 1.20                          |
| Severe Drought | Midday      | DD        | SmallLeaf         | 20  | 1.00                          |
| Severe Drought | Midday      | DD        | SmallLeaf         | 47  | 0.70                          |
| Severe Drought | Midday      | DD        | Tipo_Chaco        | 21  | 3.20                          |
| Severe Drought | Midday      | DD        | Tipo_Chaco        | 48  | 0.10                          |
| Severe Drought | Midday      | DD        | Tipo_Chaco        | 102 | 0.30                          |
| Severe Drought | Midday      | DD        | TM_1              | 22  | 0.01                          |
| Severe Drought | Midday      | DD        | TM_1              | 130 | 28.90                         |
| Severe Drought | Midday      | DD        | TM_1              | 157 | 0.10                          |
| Severe Drought | Midday      | DD        | TX_0180           | 50  | 1.30                          |
| Severe Drought | Midday      | DD        | TX_0180           | 104 | 2.10                          |
| Severe Drought | Midday      | DD        | UA48              | 78  | 0.50                          |
| Severe Drought | Midday      | DD        | UA48              | 159 | 0.01                          |
| Severe Drought | Midday      | DD        | UGA230            | 79  | 0.01                          |
| Severe Drought | Midday      | DD        | UGA230            | 133 | 0.01                          |
| Severe Drought | Midday      | DD        | VirescentNankeen  | 26  | 0.01                          |
| Severe Drought | Midday      | DD        | VirescentNankeen  | 80  | 0.70                          |
| Severe Drought | Midday      | DD        | WesternStormproof | 27  | 6.10                          |
| Severe Drought | Midday      | DD        | WesternStormproof | 135 | 0.20                          |
| Severe Drought | Midday      | WW        | Coker310          | 110 | 24.80                         |
| Severe Drought | Midday      | WW        | CS50              | 84  | 24.70                         |
| Severe Drought | Midday      | WW        | CupLeaf           | 31  | 23.30                         |
| Severe Drought | Midday      | WW        | CupLeaf           | 58  | 26.20                         |
| Severe Drought | Midday      | WW        | DeltaPine154982XF | 5   | 19.90                         |
| Severe Drought | Midday      | WW        | DeltaPine16       | 87  | 21.00                         |
| Severe Drought | Midday      | WW        | DeltaPine16       | 114 | 20.60                         |
| Severe Drought | Midday      | WW        | DeRidderRed       | 34  | 19.80                         |
| Severe Drought | Midday      | WW        | DeRidderRed       | 88  | 26.00                         |
| Severe Drought | Midday      | WW        | DeRidderRed       | 142 | 23.70                         |
| Severe Drought | Midday      | WW        | Durango           | 8   | 25.40                         |

| Time.Course    | Time.of.Day | Treatment | Genotype          | ID  | Volumetric.Soil.Water.Content |
|----------------|-------------|-----------|-------------------|-----|-------------------------------|
| Severe Drought | Midday      | WW        | Durango           | 89  | 18.90                         |
| Severe Drought | Midday      | WW        | DwarfRedHarrison  | 63  | 24.30                         |
| Severe Drought | Midday      | WW        | DwarfRedHarrison  | 117 | 14.60                         |
| Severe Drought | Midday      | WW        | DwarfRedHarrison  | 144 | 24.20                         |
| Severe Drought | Midday      | WW        | FregoVirescent    | 145 | 27.70                         |
| Severe Drought | Midday      | WW        | Gumbo             | 11  | 21.30                         |
| Severe Drought | Midday      | WW        | Gumbo             | 38  | 21.20                         |
| Severe Drought | Midday      | WW        | Lankart57         | 94  | 18.80                         |
| Severe Drought | Midday      | WW        | Lankart57         | 121 | 17.50                         |
| Severe Drought | Midday      | WW        | Lorinator         | 41  | 23.40                         |
| Severe Drought | Midday      | WW        | Lorinator         | 95  | 21.20                         |
| Severe Drought | Midday      | WW        | Lorinator         | 149 | 21.10                         |
| Severe Drought | Midday      | WW        | Mexico910         | 69  | 25.70                         |
| Severe Drought | Midday      | WW        | NM240162          | 70  | 19.80                         |
| Severe Drought | Midday      | WW        | PD3               | 44  | 21.70                         |
| Severe Drought | Midday      | WW        | PD3               | 71  | 27.60                         |
| Severe Drought | Midday      | WW        | PD3               | 125 | 22.10                         |
| Severe Drought | Midday      | WW        | SmallLeaf         | 74  | 25.10                         |
| Severe Drought | Midday      | WW        | SmallLeaf         | 101 | 22.90                         |
| Severe Drought | Midday      | WW        | Tipo_Chaco        | 75  | 21.50                         |
| Severe Drought | Midday      | WW        | TM_1              | 49  | 23.90                         |
| Severe Drought | Midday      | WW        | TM_1              | 76  | 28.90                         |
| Severe Drought | Midday      | WW        | TM_1              | 103 | 22.20                         |
| Severe Drought | Midday      | WW        | TX_0180           | 23  | 17.90                         |
| Severe Drought | Midday      | WW        | TX_0180           | 77  | 26.80                         |
| Severe Drought | Midday      | WW        | UGA230            | 52  | 26.90                         |
| Severe Drought | Midday      | WW        | UGA230            | 160 | 20.90                         |
| Severe Drought | Midday      | WW        | VirescentNankeen  | 53  | 17.40                         |
| Severe Drought | Midday      | WW        | VirescentNankeen  | 107 | 20.40                         |
| Severe Drought | Midday      | WW        | WesternStormproof | 108 | 24.30                         |
| Severe Drought | Midday      | WW        | WesternStormproof | 162 | 22.70                         |
